# Supplementary material for: A cellulose acetate/Amygdalus pedunculata shell-derived activated carbon composite monolith for phenol adsorption
Source: PubMed Central journal article supplement (PMC9078407; doi:10.1039/c7ra13017a), 2018-02-16
Supplement: RA-008-C7RA13017A-s001.pdf [file RA-008-C7RA13017A-s001.pdf]

## Supporting Information

### Cellulose acetate/*Amygdalus pedunculata* shell-derived activated carbon composite monolith for phenol adsorption

Qiancheng Xiong<sup>a,b</sup>, Qihong Bai<sup>a</sup>, Cong Li<sup>a</sup>, Yuanyuan He<sup>b</sup>, Yehua Shen<sup>†a</sup>, Hiroshi Uyama<sup>†a,c</sup>

<sup>a</sup> Key Laboratory of Synthetic and Natural Functional Molecule Chemistry of Ministry of Education, College of Chemistry and Materials Science, Northwest University, Xi'an 710127, Shaanxi Province, China

<sup>b</sup> College of Pharmaceutical Engineering, Shaanxi Fashion Engineering University, Xi'an 712046, Shaanxi Province, China

<sup>c</sup> Department of Applied Chemistry, Graduate School of Engineering, Osaka University, Suita 565-0871, Japan

Corresponding author: Tel: +86-29-88302635; E-mail: yhshen@nwu.edu.cn

Corresponding author. Tel.: +81-6-6879-7364; Fax: +81-6-6879-7367;

E-mail: uyama@chem.eng.osaka-u.ac.jp

#### **Content:**

**Fig. S1.** Fabrication procedure of the CA/AC composite monolith

**Fig. S2.** SEM images of AC powder (a), CA monolith(b)

**Fig. S3.** Effect of different AC power (m CA : AC) adsorption onto CA/AC composite monolith ( $C_0$ : 0.8 mg/mL, pH:7, adsorbent dosage: 0.02 g, temperature: 25 °C)

**Table S1.** Surface properties of CA monolith and CA/AC monolith

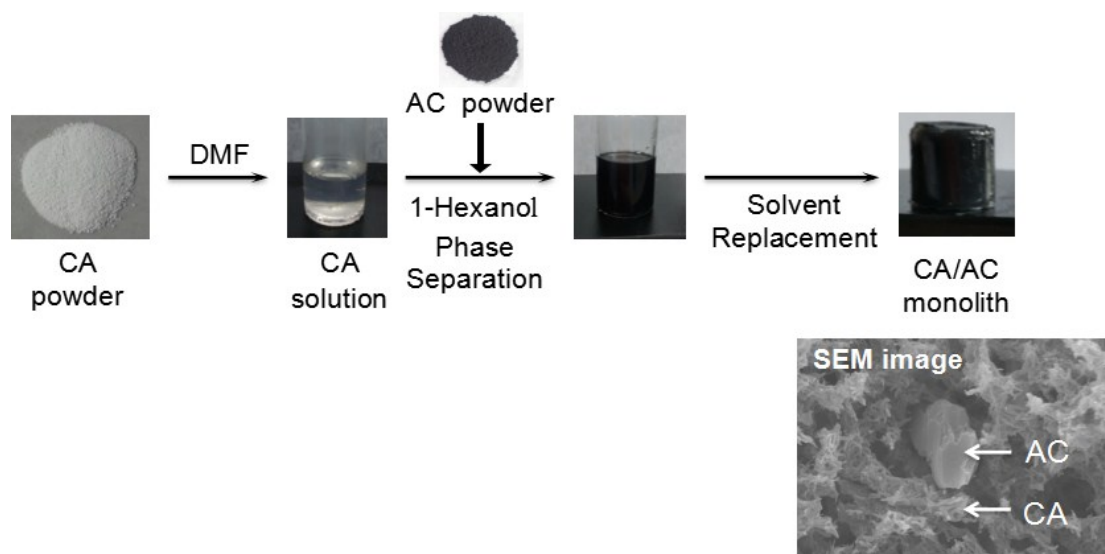

**Fig. S1.** Fabrication procedure of the CA/AC composite monolith

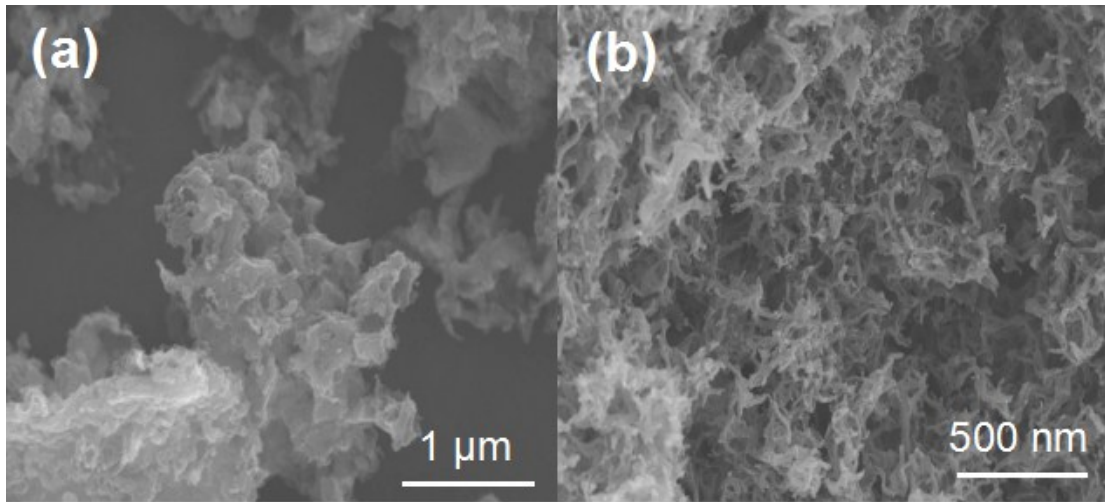

**Fig. S2.** SEM images of AC power (a), CA monolith(b)

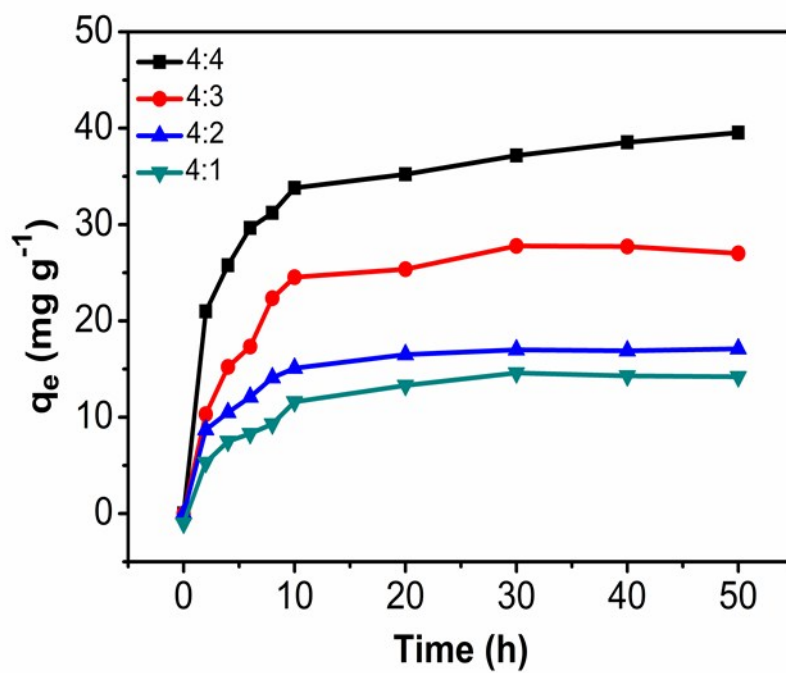

**Fig. S3.** Effect of different AC power (CA : AC) adsorption onto CA/AC composite monolith ( $C_0$ : 0.8 mg/mL, pH:7, adsorbent dosage: 0.02 g, temperature: 25 °C)

**Table S1.** Surface properties of CA monolith and CA/AC monolith

| Samples        | Surface Area<br>(m <sup>2</sup> g <sup>-1</sup> ) | Pore Volume<br>(cm <sup>3</sup> /g) | Pore Size<br>(nm) |
|----------------|---------------------------------------------------|-------------------------------------|-------------------|
| CA monolith    | 19                                                | 0.04                                | 9.1               |
| CA/AC monolith | 262                                               | 0.26                                | 4.0               |
